# Supplementary material for: Facile conversion of coal tar to orange fluorescent carbon quantum dots and their composite encapsulated by liposomes for bioimaging
Source: Royal Society of Chemistry journal article supplement (doi:10.1039/c7nj03005c), 2017-01-01
Supplement: c7nj03005c1.pdf [file c7nj03005c1.pdf]

## Supporting Information

### Facile Conversion of Coal Tar to Orange Fluorescent Carbon Quantum Dots and Their Composite Encapsulated by Liposomes for Bioimaging

Bijiang Geng,<sup>a</sup> Dewen Yang,<sup>a</sup> Fengfeng Zheng,<sup>a</sup> Chen Zhang,<sup>a</sup> Jing Zhan,<sup>a</sup> Zhen Li,<sup>a</sup> Dengyu Pan,<sup>\*,a</sup> and Liang Wang<sup>\*,b</sup>

<sup>a</sup> School of Environmental and Chemical Engineering, Shanghai University, Shanghai 200444, P.R. China

<sup>b</sup> Institute of Nanochemistry and Nanobiology, Shanghai University, Shanghai 200444, P.R. China

Correspondence and requests for materials should be addressed to D.P. and L.W. (email: dypan617@shu.edu.cn, wangl@shu.edu.cn).

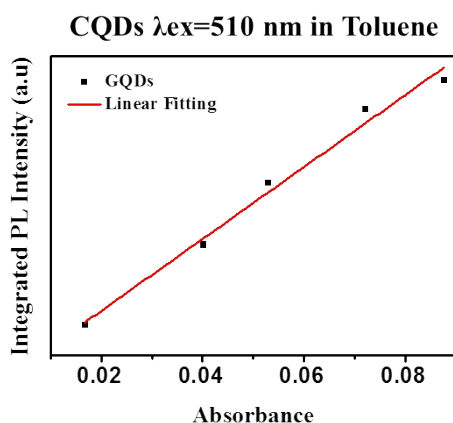

|               | CQDs              |         |         |         |        |
|---------------|-------------------|---------|---------|---------|--------|
| Abs           | 0.01682           | 0.04022 | 0.05306 | 0.07216 | 0.0877 |
| Integrated PL | 11324             | 21360   | 29070   | 38296   | 41938  |
| Slope         | $4.5 \times 10^5$ |         |         |         |        |
| QY            | 29.7 %            |         |         |         |        |

Figure S1. Plots of integrated PL intensity of CQDs as a function of optical absorbance at 510 nm and relevant data.

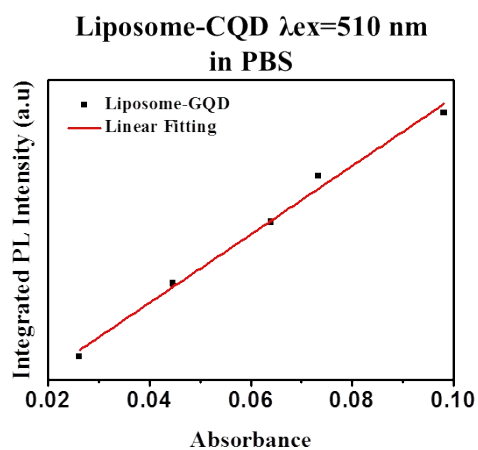

|               | Liposome-CQD      |         |         |         |         |
|---------------|-------------------|---------|---------|---------|---------|
| Abs           | 0.02615           | 0.04461 | 0.06391 | 0.07327 | 0.09812 |
| Integrated PL | 5365              | 9785    | 13465   | 16235   | 20025   |
| Slope         | $4.1 \times 10^4$ |         |         |         |         |
| QY            | 10.7 %            |         |         |         |         |

Figure S2. Plots of integrated PL intensity of liposome-CQD as a function of optical absorbance at 510 nm and relevant data.

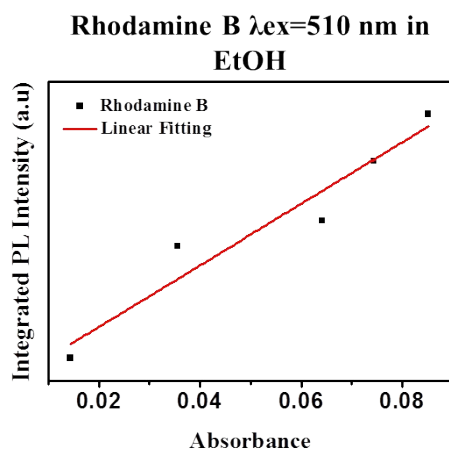

|               | Rhodamine B        |         |         |         |         |
|---------------|--------------------|---------|---------|---------|---------|
| Abs           | 0.01435            | 0.03564 | 0.06416 | 0.07431 | 0.08511 |
| Integrated PL | 37734              | 74989   | 83583   | 103294  | 119036  |
| Slope         | $1.03 \times 10^6$ |         |         |         |         |
| QY            | 56 %               |         |         |         |         |

Figure S3. Plots of integrated PL intensity of rhodamine B (referenced dye) as a function of

optical absorbance at 510 nm and relevant data.

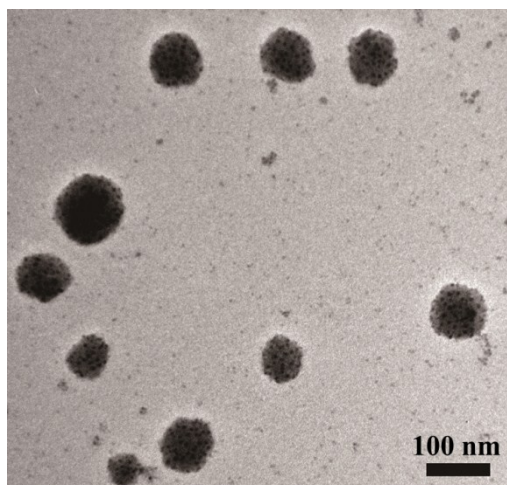

Figure S4. TEM of liposome-CQDs.
